# Supplementary material for: Superhalogens inside fullerenes X@C2n (X = BO2, BeF3; 2n = 60, 70)
Source: Royal Society of Chemistry journal article supplement (doi:10.1039/d4cp02082k), 2024-01-01
Supplement: d4cp02082k2.pdf [file d4cp02082k2.pdf]

*Electronic Supplementary Information (ESI) of*  
**Superhalogen inside fullerenes X@C<sub>2n</sub> (X = BO<sub>2</sub>, BeF<sub>3</sub>; 2n = 60, 70)**

Mo Xiong<sup>a,\*</sup>, Chuncai Kong<sup>a</sup>, Zhimao Yang<sup>a</sup>, and Tao Yang<sup>a,\*</sup>

<sup>a</sup>MOE Key Laboratory for Non-Equilibrium Synthesis and Modulation of Condensed Matter, School of Physics, Xi'an Jiaotong University, Xi'an 710049, Shaanxi, China

Email: xiongmo@xjtu.edu.cn; taoyang1@xjtu.edu.cn

## Content

|                                                                                                                                                                                                                                          |    |
|------------------------------------------------------------------------------------------------------------------------------------------------------------------------------------------------------------------------------------------|----|
| <b>Figure S1.</b> Fluctuation of total potential energy and temperature of superhalogen-encapsulated fullerenes during the AIMD simulation at 300 K. ....                                                                                | 3  |
| <b>Figure S2.</b> The snapshot structure at 3.0 ps ~ 5.0 ps for superhalogen-encapsulated fullerenes during the AIMD simulation at 300 K.....                                                                                            | 4  |
| <b>Figure S3.</b> The bond length distributions for superhalogen-encapsulated fullerenes during the AIMD simulation at 300 K. ....                                                                                                       | 5  |
| <b>Figure S4</b> Geometry structure, the total densities of states, and band structure of 1D C <sub>60</sub> nanowire. ....                                                                                                              | 11 |
| <b>Table S1</b> The encapsulation energies (kcal/mol) of X@C <sub>60</sub> and X@C <sub>70</sub> (X = BO <sub>2</sub> , BeF <sub>3</sub> , BF <sub>4</sub> , LiF <sub>2</sub> , NO <sub>3</sub> ) calculated at PBE-D3(zero) level. .... | 2  |
| <b>Table S2</b> The NBO and QTAIM charges of superhalogen in the complexes, and the Wiberg bond order <i>P</i> for B–O and Be–F bond. ....                                                                                               | 6  |
| <b>Table S3</b> Calculated Electron Density and its Laplacian at the Bond Critical Point of the superhalogens. (All the Quantities are in a.u.).....                                                                                     | 7  |
| <b>Table S4</b> Calculated Electron Density and Laplacian of Electron Densities for BO <sub>2</sub> and BeF <sub>3</sub> encapsulated C <sub>60</sub> and C <sub>70</sub> at Bond Critical Point (BCP). ....                             | 8  |
| <b>Table S5</b> EDA results of X@C <sub>2n</sub> (X = BO <sub>2</sub> , BeF <sub>3</sub> ; 2n = 60, 70) using different fragments with various electronic states (S = Singlet, D = Doublet).....                                         | 9  |
| <b>Table S6</b> Bader charges ( $ e^- $ ) of X and C <sub>60</sub> in X@C <sub>60</sub> calculated at PBE-D3(zero) level via VASP software. ....                                                                                         | 10 |

**Table S1** The encapsulation energies (kcal/mol) of X@C<sub>60</sub> and X@C<sub>70</sub> (X = BO<sub>2</sub>, BeF<sub>3</sub>, BF<sub>4</sub>, LiF<sub>2</sub>, NO<sub>3</sub>) calculated at PBE-D3(zero) level.

|                 | BO <sub>2</sub> | BeF <sub>3</sub> | BF <sub>4</sub> | LiF <sub>2</sub> | NO <sub>3</sub> |
|-----------------|-----------------|------------------|-----------------|------------------|-----------------|
| C <sub>60</sub> | <b>-7.0</b>     | <b>-56.8</b>     | 12.8            | 17.9             | --              |
| C <sub>70</sub> | <b>-45.3</b>    | <b>-52.4</b>     | -48.1           | -48.9            | 8.3             |

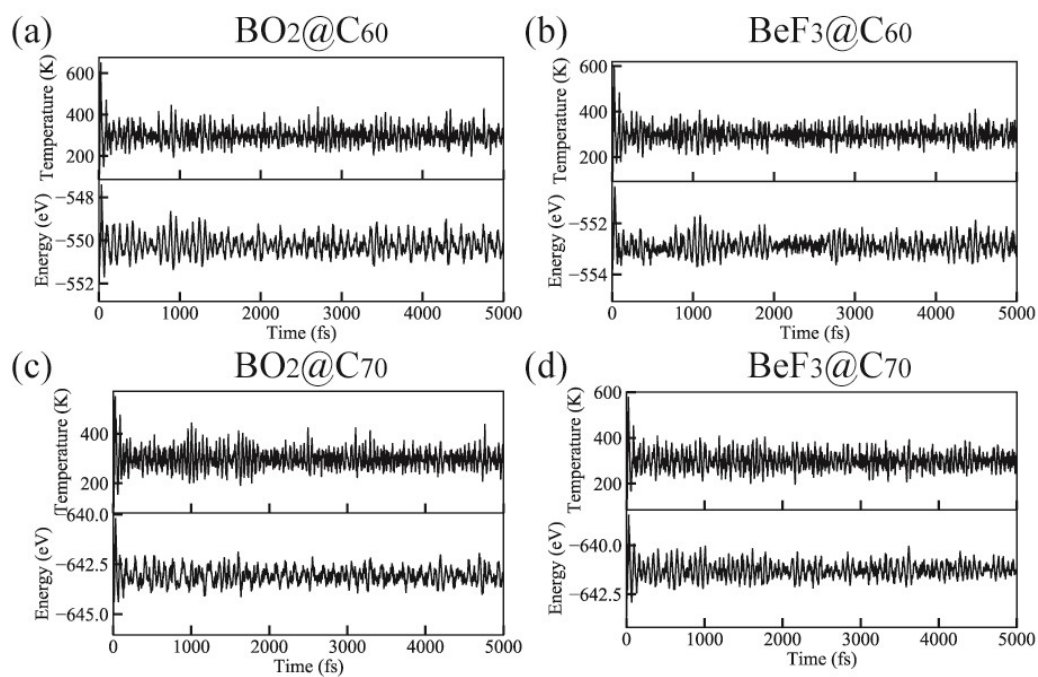

**Fig. S1** Fluctuation of total potential energy and temperature of (a)  $\text{BO}_2@C_{60}$ , (b)  $\text{BeF}_3@C_{60}$ , (c)  $\text{BO}_2@C_{70}$ , and (d)  $\text{BeF}_3@C_{70}$  complex during the AIMD simulation at 300 K.

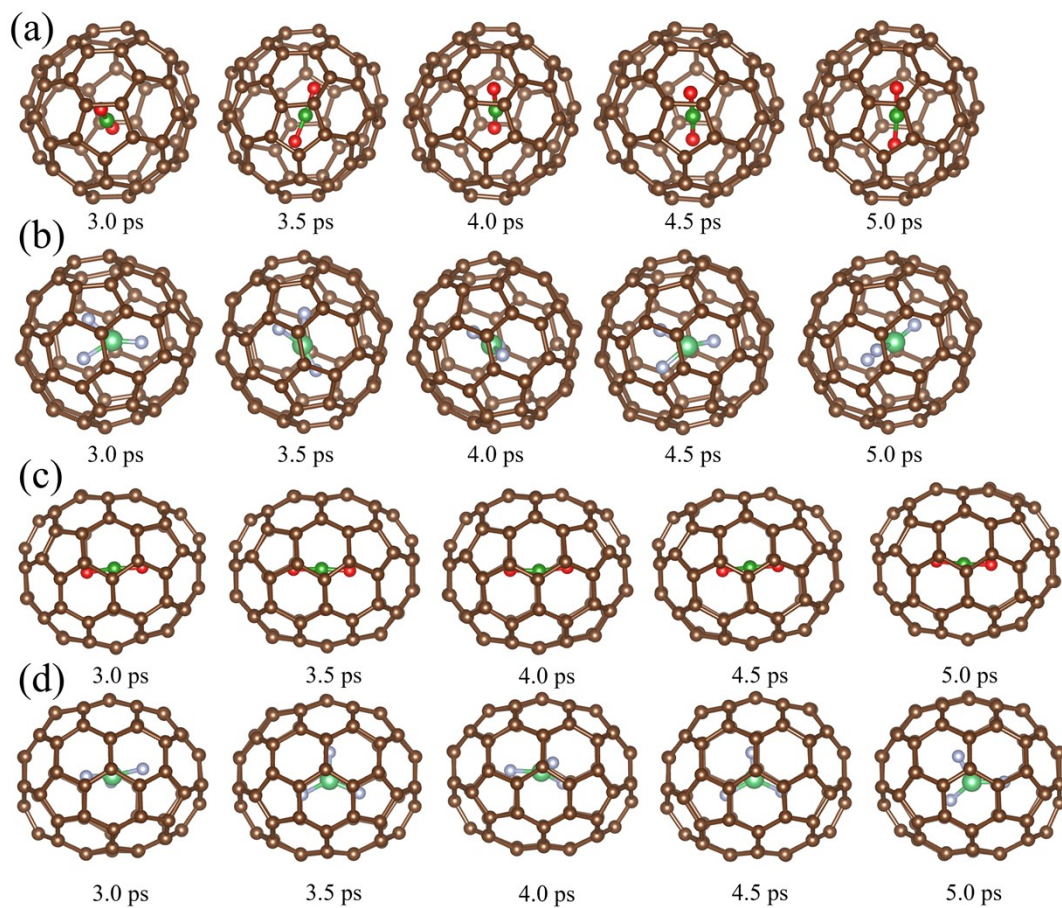

**Fig. S2** The snapshot structure at 3.0 ps ~ 5.0 ps for (a)  $\text{BO}_2@C_{60}$ , (b)  $\text{BeF}_3@C_{60}$ , (c)  $\text{BO}_2@C_{70}$  and (d)  $\text{BeF}_3@C_{70}$  during the AIMD simulation at 300 K.

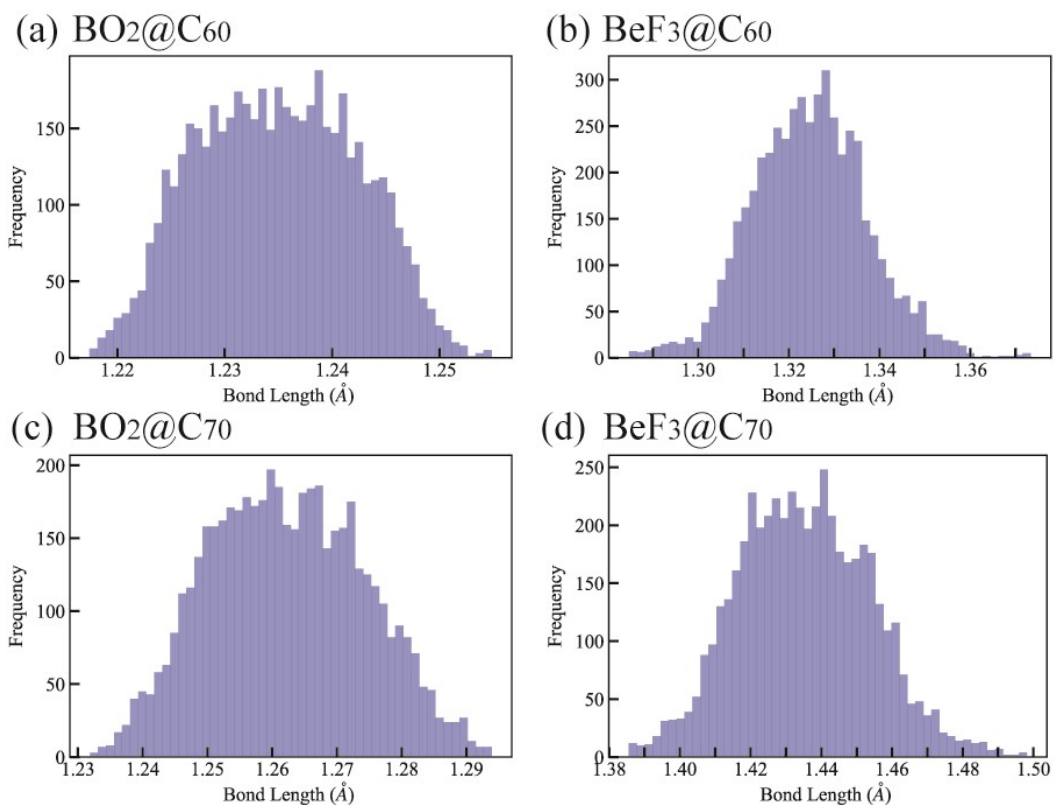

**Fig. S3** (a) The B–O bond length distributions for  $\text{BO}_2@C_{60}$ , (b) the Be–F bond length distributions for  $\text{BeF}_3@C_{60}$ , (c) the B–O bond length distributions for  $\text{BO}_2@C_{70}$ , and (d) the Be–F bond length distributions for  $\text{BeF}_3@C_{70}$  complex during the AIMD simulation at 300 K.

**Table S2** The NBO and QTAIM charges ( $|e^-|$ ) of superhalogen in the complexes, the Wiberg bond order  $P$  and the bond length  $d$  (Å) for B–O and Be–F bond obtained at the  $\omega$ B97XD/TZ2P// $\omega$ B97XD/def2-TZVP level.

| Complexes                         | Atom | Q(X)NPA | Q(X)AIM | P(B–O) | $P(\text{Be–F})$ | $d(\text{B–O})$ | $d(\text{Be–F})$ |
|-----------------------------------|------|---------|---------|--------|------------------|-----------------|------------------|
| BO <sub>2</sub>                   | B    | 1.11    | 2.29    | 1.45   |                  | 1.258           |                  |
|                                   | O    | –0.56   | –1.15   | 1.45   |                  | 1.258           |                  |
|                                   | O    | –0.56   | –1.15   |        |                  |                 |                  |
| BeF <sub>3</sub>                  | Be   | 1.73    | 1.76    |        | 0.23             |                 | 1.389            |
|                                   | F    | –0.86   | –0.86   |        | 0.14             |                 | 1.530            |
|                                   | F    | –0.44   | –0.45   |        | 0.14             |                 | 1.530            |
| BO <sub>2</sub> <sup>–</sup>      | B    | 1.11    | 2.30    | 1.45   |                  | 1.259           |                  |
|                                   | O    | –1.05   | –1.65   | 1.45   |                  | 1.259           |                  |
|                                   | O    | –1.05   | –1.65   |        |                  |                 |                  |
| BeF <sub>3</sub> <sup>–</sup>     | Be   | 1.72    | 1.76    |        | 0.17             |                 | 1.483            |
|                                   | F    | –0.91   | –0.92   |        | 0.17             |                 | 1.483            |
|                                   | F    | –0.91   | –0.92   |        | 0.17             |                 | 1.483            |
| BO <sub>2</sub> @C <sub>60</sub>  | B    | 1.56    | 2.30    | 1.16   |                  | 1.221           |                  |
|                                   | O    | –1.29   | –1.60   | 1.16   |                  | 1.221           |                  |
|                                   | O    | –1.29   | –1.60   |        |                  |                 |                  |
| BeF <sub>3</sub> @C <sub>60</sub> | Be   | 1.78    | 1.74    |        | 0.10             |                 | 1.365            |
|                                   | F    | –0.95   | –0.91   |        | 0.10             |                 | 1.368            |
|                                   | F    | –0.95   | –0.89   |        | 0.10             |                 | 1.368            |
| BO <sub>2</sub> @C <sub>70</sub>  | B    | 1.30    | 2.32    | 1.34   |                  | 1.251           |                  |
|                                   | O    | –1.15   | –1.61   | 1.34   |                  | 1.251           |                  |
|                                   | O    | –1.15   | –1.60   |        |                  |                 |                  |
| BeF <sub>3</sub> @C <sub>70</sub> | Be   | 1.76    | 1.75    |        | 0.13             |                 | 1.411            |
|                                   | F    | –0.93   | –0.90   |        | 0.12             |                 | 1.429            |
|                                   | F    | –0.93   | –0.90   |        | 0.13             |                 | 1.429            |
|                                   | F    | –0.93   | –0.89   |        |                  |                 |                  |

**Table S3** Calculated Electron Density and its Laplacian at the Bond Critical Point of the superhalogens. (All the Quantities are in a.u.)

| <b>Superhalogen</b>           | <b>Isolated</b> |                     | <b>In C<sub>60</sub></b> |                     | <b>In C<sub>70</sub></b> |                     |
|-------------------------------|-----------------|---------------------|--------------------------|---------------------|--------------------------|---------------------|
|                               | $\rho(r_c)$     | $\nabla^2\rho(r_c)$ | $\rho(r_c)$              | $\nabla^2\rho(r_c)$ | $\rho(r_c)$              | $\nabla^2\rho(r_c)$ |
| BO <sub>2</sub>               | 0.2879486       | 1.182678            | 0.3120965                | 1.411586            | 0.2904327                | 1.201068            |
|                               | 0.2879485       | 1.182679            | 0.3121055                | 1.411697            | 0.290401                 | 1.200747            |
| BeF <sub>3</sub>              | 0.1458025       | 1.166818            | 0.1510395                | 1.308987            | 0.1246373                | 1.009768            |
|                               | 0.08939327      | 0.6823115           | 0.149979                 | 1.295308            | 0.13173                  | 1.090542            |
|                               | 0.08939327      | 0.6823115           | 0.1500051                | 1.293365            | 0.1245666                | 1.008866            |
| BO <sub>2</sub> <sup>-</sup>  | 0.2831167       | 1.147832            |                          |                     |                          |                     |
|                               | 0.2831167       | 1.147832            |                          |                     |                          |                     |
| BeF <sub>3</sub> <sup>-</sup> | 0.1066436       | 0.8128306           |                          |                     |                          |                     |
|                               | 0.1064915       | 0.8113143           |                          |                     |                          |                     |
|                               | 0.1064915       | 0.8113143           |                          |                     |                          |                     |

**Table S4** Calculated Electron Density and Laplacian of Electron Densities for BO<sub>2</sub> and BeF<sub>3</sub> encapsulated C<sub>60</sub> and C<sub>70</sub> at Bond Critical Point (BCP).

| BCP | BO <sub>2</sub> @C <sub>60</sub> |                     |   | BeF <sub>3</sub> @C <sub>60</sub> |                     |
|-----|----------------------------------|---------------------|---|-----------------------------------|---------------------|
|     | $\rho(r_c)$                      | $\nabla^2\rho(r_c)$ |   | $\rho(r_c)$                       | $\nabla^2\rho(r_c)$ |
| 1   | 0.02730935                       | 0.1261491           | 1 | 0.03262463                        | 0.1650219           |
| 2   | 0.02686009                       | 0.1243469           | 2 | 0.03260767                        | 0.1649477           |
| 3   | 0.02687295                       | 0.124393            | 3 | 0.03455546                        | 0.1718149           |
| 4   | 0.02733373                       | 0.1262457           | 4 | 0.0246587                         | 0.1194284           |
|     |                                  |                     | 5 | 0.03059264                        | 0.1533274           |
|     |                                  |                     | 6 | 0.03055286                        | 0.1531621           |
|     | BO <sub>2</sub> @C <sub>70</sub> |                     |   | BeF <sub>3</sub> @C <sub>70</sub> |                     |
|     | $\rho(r_c)$                      | $\nabla^2\rho(r_c)$ |   | $\rho(r_c)$                       | $\nabla^2\rho(r_c)$ |
| 1   | 0.0103137                        | 0.04534308          | 1 | 0.0181594                         | 0.0894681           |
| 2   | 0.01040412                       | 0.04576176          | 2 | 0.01914713                        | 0.09109866          |
| 3   | 0.01035883                       | 0.04577179          | 3 | 0.01958082                        | 0.09327319          |
| 4   | 0.0104441                        | 0.04592899          | 4 | 0.01773343                        | 0.08434358          |
| 5   | 0.01030795                       | 0.04532053          | 5 | 0.02729897                        | 0.1335843           |
| 6   | 0.01020926                       | 0.04510525          |   |                                   |                     |
| 7   | 0.01041595                       | 0.04581569          |   |                                   |                     |
| 8   | 0.01041299                       | 0.04580288          |   |                                   |                     |
| 9   | 0.01047702                       | 0.04611701          |   |                                   |                     |
| 10  | 0.01045374                       | 0.0460203           |   |                                   |                     |



**Table S5** EDA results at the  $\omega$ B97XD/TZ2P// $\omega$ B97XD/def2-TZVP level level of X@C<sub>2n</sub> (X = BO<sub>2</sub>, BeF<sub>3</sub>; 2n = 60, 70) using different fragments with various electronic states (S = Singlet, D = Doublet). Energies are in kcal/mol. The best bonding model is given by the smallest absolute  $\Delta E_{\text{orb}}$  value in bold format.

| Complex                           | Model | Fragments                                                            | $\Delta E_{\text{int}}$ | $\Delta E_{\text{Pauli}}$ | $\Delta E_{\text{elstat}}$ | $\Delta E_{\text{disp}}$ | $\Delta E_{\text{orb}}$ |
|-----------------------------------|-------|----------------------------------------------------------------------|-------------------------|---------------------------|----------------------------|--------------------------|-------------------------|
| BO <sub>2</sub> @C <sub>60</sub>  | A     | BO <sub>2</sub> <sup>-</sup> (S) + C <sub>60</sub> <sup>+</sup> (D)  | -105.3                  | 136.7                     | -172.0                     | -32.4                    | <b>-37.6</b>            |
|                                   | B     | BO <sub>2</sub> (D) + C <sub>60</sub> (S)                            | -73.6                   | 102.8                     | -45.3                      | -32.4                    | -98.8                   |
| BeF <sub>3</sub> @C <sub>60</sub> | A     | BeF <sub>3</sub> <sup>-</sup> (S) + C <sub>60</sub> <sup>+</sup> (D) | -74.3                   | 203.9                     | -195.5                     | -35.5                    | <b>-47.2</b>            |
|                                   | B     | BeF <sub>3</sub> (D) + C <sub>60</sub> (S)                           | -66.8                   | 171.6                     | -68.1                      | -35.5                    | -134.8                  |
| BO <sub>2</sub> @C <sub>70</sub>  | A     | BO <sub>2</sub> <sup>-</sup> (S) + C <sub>70</sub> <sup>+</sup> (D)  | -136.5                  | 40.4                      | -119.6                     | -30.7                    | <b>-26.7</b>            |
|                                   | B     | BO <sub>2</sub> (D) + C <sub>70</sub> (S)                            | -104.4                  | 27.31                     | -15.3                      | -30.7                    | -85.7                   |
| BeF <sub>3</sub> @C <sub>70</sub> | A     | BeF <sub>3</sub> <sup>-</sup> (S) + C <sub>70</sub> <sup>+</sup> (D) | -111.2                  | 98.2                      | -143.1                     | -34.5                    | <b>-32.9</b>            |
|                                   | B     | BeF <sub>3</sub> (D) + C <sub>70</sub> (S)                           | -114.4                  | 80.9                      | -34.8                      | -34.5                    | -126.0                  |

**Table S6** Bader charges ( $|e^-|$ ) of X and C<sub>60</sub> in X@C<sub>60</sub> calculated at PBE-D3(zero) level via VASP software.

|                                                       | Q(Li) | Q(C <sub>60</sub> ) | Q(BO <sub>2</sub> ) | Q(C <sub>60</sub> ) | Q(BeF <sub>3</sub> ) | Q(C <sub>60</sub> ) |
|-------------------------------------------------------|-------|---------------------|---------------------|---------------------|----------------------|---------------------|
| Li@C <sub>60</sub>                                    | +0.88 | -0.88               |                     |                     |                      |                     |
| BO <sub>2</sub> @C <sub>60</sub>                      |       |                     | -0.84               | +0.84               |                      |                     |
| BeF <sub>3</sub> @C <sub>60</sub>                     |       |                     |                     |                     | -0.97                | +0.97               |
| BO <sub>2</sub> @C <sub>60</sub> -Li@C <sub>60</sub>  | +0.87 | -0.49               | -0.81               | +0.43               |                      |                     |
| BeF <sub>3</sub> @C <sub>60</sub> -Li@C <sub>60</sub> | +0.84 | -0.28               |                     |                     | -1.01                | +0.45               |

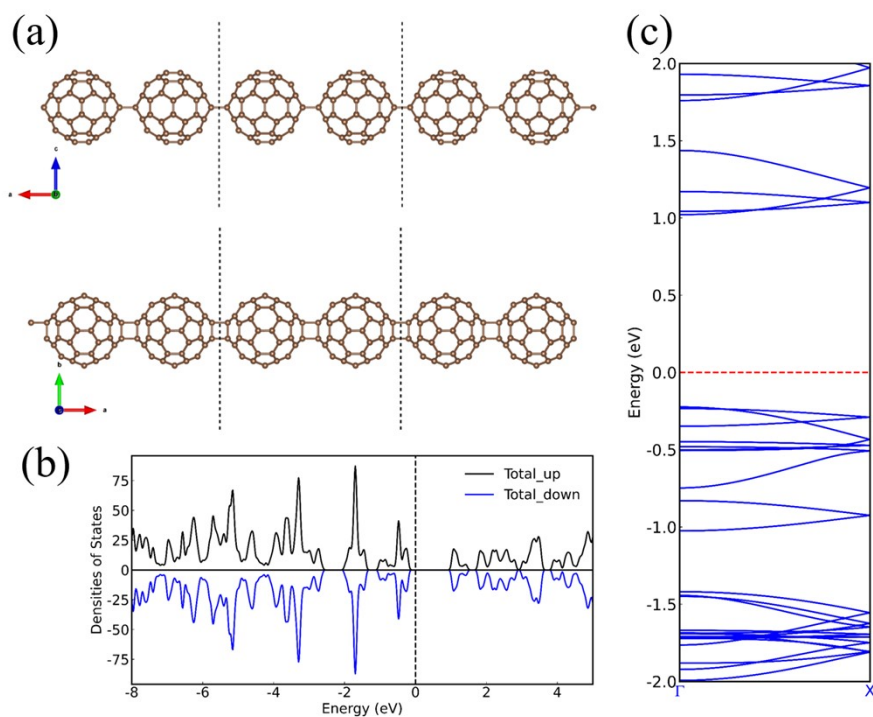

**Fig. S4** (a) Geometry structure (side and top view), (b) the total densities of states, and (c) band structure of 1D C<sub>60</sub> nanowire.
